# Supplementary material
Source: ML conference proceedings conference paper supplement (https://openreview.net/forum?id=y8krjkLfE7w)
Supplement: supplementary_material [file attachment]

## A PROOFS FOR SECTION 4

**Theorem 1.** *If  $\Phi^*$  is a feature matrix minimizing  $\mathcal{L}_{MCSM}(\Phi)$ , then its column space spans the top  $d$  left singular vectors of the (infinite-dimensional) successor measure matrix  $\Psi$  with respect to the inner product  $(x, y)_\Xi = y^\top \Xi x$ , for all  $x, y \in \mathbb{R}^n$ . Here,  $\Xi \in \mathbb{R}^{\mathcal{X} \times \mathcal{X}}$  is the diagonal matrix whose entries are given by  $\xi$ .*

*Proof.* We consider the SVD of the successor measure  $\psi$  with respect to the weighted inner product  $\Xi$ . In matrix form, we write

$$\Psi = F \Sigma B^\top$$

where  $F \in \mathbb{R}^{n \times d}$ ,  $\Sigma \in \mathbb{R}^{d \times d}$  and  $B \in \mathbb{R}^{n \times d}$  satisfy

$$F^\top F = I, B^\top \Xi B = I, \Sigma = \text{diag}(\sigma_1, \dots, \sigma_d)$$

and  $\sigma_i$  are the singular values of  $\Psi$  sorted in decreasing order.

$$\begin{aligned} \arg \min_{\Phi \in \mathbb{R}^{n \times d}} \mathcal{L}_{MCSM}(\Phi) &= \arg \min_{\Phi \in \mathbb{R}^{n \times d}} \min_{W \in \mathbb{R}^d} \mathbb{E}_{S \sim \xi} \left[ \left( \sum_{x \in \mathcal{X}, a \in \mathcal{A}} (\phi(x)^\top w_{S,a} - \psi(x, a, S))^2 \right) \right] \\ &= \arg \min_{\Phi \in \mathbb{R}^{n \times d}} \min_W \|(\Phi W - \Psi)\|_\Xi^2 \\ &= \arg \min_{\Phi \in \mathbb{R}^{n \times d}} \|\Pi_\Phi^\perp \Psi\|_\Xi^2 \end{aligned}$$

where  $\Pi_\Phi$  is the orthogonal projection onto  $\text{span}(\Phi)$ . The above is equivalent to saying that  $\Phi$  must span the top  $d$  singular vectors of  $\Psi$ .  $\square$

## B IMPLEMENTATION DETAILS

### B.1 UNIVERSAL HASH FUNCTIONS

We define the set of multiply-shift universal hash functions (Carter & Wegman, 1979) as:

$$h_i(x) = \left( a_0^{(i)} + \sum_{j=1}^n a_j^{(i)} \cdot x_j \bmod p \right) \bmod m,$$

where  $x \in \mathbb{R}^n$  is a flattened vector of the environment’s observation,  $a^{(i)} \in \mathbb{R}^n$  is a randomly initialized vector that parameterizes the hash function,  $p$  is a prime, which in our case is the Mersenne prime  $p = 2^{13} - 1$ , and  $m$  allows us to control the activation proportion of the indicator function. We can now define the indicator function as follows:

$$f_i(x) = \mathbf{1}\{h_i(x) = 0\}.$$

### B.2 QUANTILE REGRESSION

We use quantile regression to tune the proportion of states that trigger our random network indicator functions. To do so, we use a tunable bias that we update with gradient descent. First, recall that the random network indicators are computed using a random neural network  $f : x \mapsto \mathbb{R}$ . If we naively apply the SIGN function to the network output, the proportion of states that map to 1 is unlikely to match the target proportion  $p$ . Therefore, we first add a bias term to the output  $r' = f(x) + b$ , and then tune the bias to minimize the quantile regression loss

$$\mathcal{L}_{\text{QR}}(b) = \mathbb{E}_{x \in \mathcal{X}} r'(x) \cdot ((1 - p) - \text{SIGN}(r'(x))) \quad (2)$$

Once the bias has been tuned, the output of the random network indicator is  $r = \text{SIGN}(f(x) + b)$ .

## B.3 ALGORITHM

Algorithm 1 gives pseudo-code for the method as implemented with a fixed replay memory.

**Algorithm 1** Proto-Value Networks

---

**Require:** Transition dataset  $\mathcal{D}$ , Function approximator  $\hat{\Psi}_\theta : \mathcal{X} \rightarrow \mathbb{R}^{m \times |\mathcal{A}|}$ ,  $m$  RNI networks  $f_i : \mathcal{X} \rightarrow \mathbb{R}$ ,  $m$  RNI threshold bias vectors  $b_i$ , Polyak coefficient  $\tau$ , reward proportion  $p$

- 1: **for** step = 1, . . . **do**
- 2:   Sample mini-batch of  $n$  transitions  $\{(x, a, x')\}_{i=1}^n \subset \mathcal{D}$
- 3:
- 4:   *# Calculate random network indicators*
- 5:    $r'_j(x) \leftarrow f_j(x) + b_j \quad \forall j = 1, \dots, m$
- 6:    $r_j(x) \leftarrow \text{SIGN}(r'_j(x))$
- 7:
- 8:   *# Calculate PVN loss*
- 9:    $\mathcal{L}_{\text{PVN}}(\theta) \leftarrow \frac{1}{n} \sum_{i=1}^n \frac{1}{m} \sum_{j=1}^m \left( r_j(x_i) + \gamma \frac{1}{|\mathcal{A}|} \sum_{a' \in \mathcal{A}} \hat{\Psi}_\theta^{(j)}(x'_i, a') - \hat{\Psi}_{\theta^-}^{(j)}(x_i, a_i) \right)^2$
- 10:
- 11:   *# Calculate quantile regression loss*
- 12:    $\mathcal{L}_{\text{QR}}(b_j) \leftarrow \frac{1}{n} \sum_{i=1}^n r'_j(x) \cdot ((1-p) - \text{SIGN}(r'_j(x)))$
- 13:
- 14:   *# Perform gradient step*
- 15:   Update  $\theta \leftarrow \theta - \eta_1 \frac{\partial}{\partial \theta} \mathcal{L}_{\text{PVN}}(\theta)$
- 16:   Update  $b_j \leftarrow b_j - \eta_2 \frac{d}{db_j} \mathcal{L}_{\text{QR}}(b_j) \quad \forall j = 1, \dots, m$
- 17:
- 18:   *# Polyak average target network parameters*
- 19:    $\theta^- \leftarrow \tau \theta^- + (1 - \tau) \theta$
- 20: **end for**

---

## B.4 HYPERPARAMETERS

In the tables below we report all relevant hyperparameter choices for both our offline pre-training phase, and online learning phase.

We selected most of our hyperparameters based on best practices from previous work. We chose  $p$  based on the estimated reward proportion from actual Atari games. We tuned our online hyperparameters using 5 tuning games, ASTERIX, BEAM RIDER, PONG, QBERT, and SPACE INVADERS.

Table 1: Offline Hyperparameters

| Hyperparameter                    | Value     |
|-----------------------------------|-----------|
| Number of auxiliary tasks         | 100       |
| Batch size                        | 256       |
| Number of gradient steps          | 1,562,500 |
| Discount factor $\gamma$          | 0.99      |
| Polyak average coefficient $\tau$ | 0.99      |
| Reward proportion $p$             | 0.01      |
| Quantile regression burn-in steps | 62,500    |
| Tasks per module                  | 10        |
| Optimizer                         | Adam      |
| Learning rate                     | 1e-4      |
| Adam $\beta_1$                    | 0.9       |
| Adam $\beta_2$                    | 0.999     |
| Adam $\epsilon$                   | 1.5e-4    |

Table 2: Online Hyperparameters

| Hyperparameter              | Value      |
|-----------------------------|------------|
| Update rule                 | DQN        |
| Num. layers                 | 1 (linear) |
| Num. agent steps            | 3.75M      |
| Train $\epsilon$            | 0.01       |
| Evaluation $\epsilon$       | 0.001      |
| n step                      | 1          |
| Discount factor $\gamma$    | 0.99       |
| Optimizer                   | Adam       |
| Learning rate               | 6.25e-5    |
| Adam $\epsilon$             | 1.5e-4     |
| Maximum gradient norm       | 10         |
| Batch size                  | 32         |
| Minimum replay size         | 2,000      |
| Maximum replay size         | 1,000,000  |
| Gradient steps per env step | 1          |

## C MDS PLOTS

Below are a selection of MDS plots for the methods discussed in the paper for each of the 5 tuning games. These plots are generated using the representations learned during the pre-training phase, and one expert trajectory is presented in each plot. Darker points correspond to states at the beginning of the trajectory, and lighter points correspond to states at the end of the trajectory. These plots demonstrate that the representations learned by each method are clearly different, and therefore have different properties.

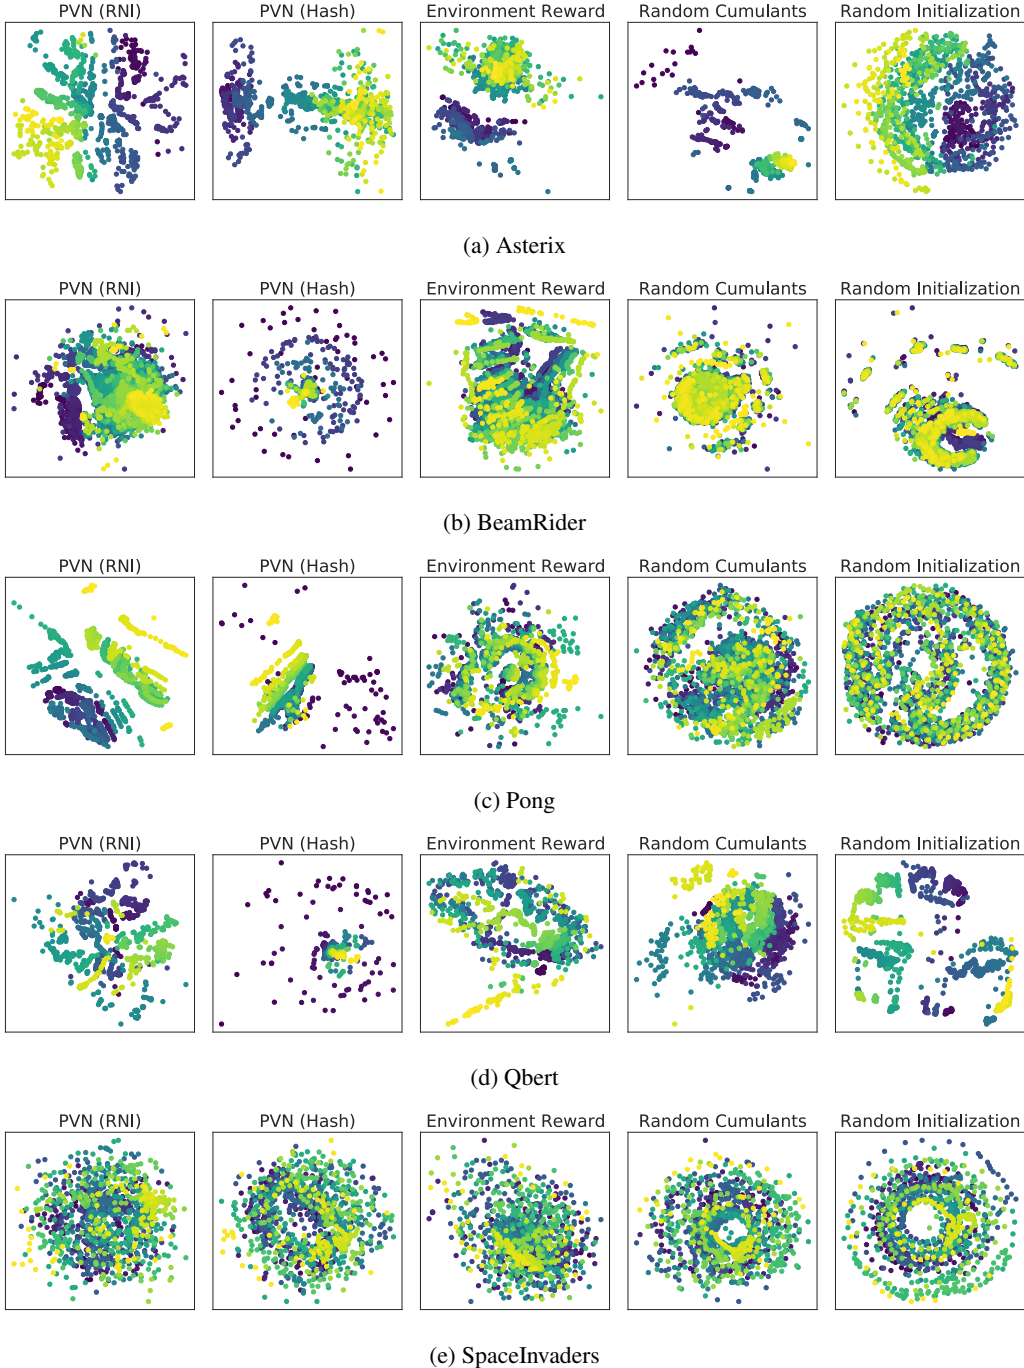

Figure 5: MDS plot for a single trajectory.

## D PER-GAME RESULTS

Below, we report the per-game results for the methods discussed in the paper. In addition, we include DQN and the Environment Reward method, which trains an encoder using the environment reward during the pre-training phase, and then uses the fixed representation to train a linear head in the same manner as the compared methods. Note that Environment Reward acts as a kind of oracle in our setting – it is the only method that has access to the environment reward during the pre-training phase. The results reported here use 1 offline seed and 3 online seeds, and evaluation scores (averaged over 100 evaluation runs) are reported after 3.75M agent steps. DQN’s performance is reported after 50M agent steps.

Table 3: Per-Game Results on RLU Games

|                | Random Init | DQN    | Env Reward | RCs    | PVN (Hash) | PVN (RNI + Opt. Policy) | PVN (RNI) |
|----------------|-------------|--------|------------|--------|------------|-------------------------|-----------|
| Alien          | 404         | 2484   | 2634       | 223    | 804        | 67                      | 1034      |
| Amidar         | 44          | 1208   | 214        | 74     | 96         | 4                       | 96        |
| Assault        | 140         | 1525   | 792        | 617    | 433        | 1464                    | 1077      |
| Asterix        | 523         | 2711   | 17412      | 266    | 17293      | 413                     | 17067     |
| Atlantis       | 14270       | 853640 | 399021     | 21981  | 5302       | 14485                   | 12318     |
| BankHeist      | 2           | 602    | 431        | 937    | 5          | 6                       | 193       |
| BattleZone     | 1683        | 17785  | 46471      | 5164   | 5516       | 12937                   | 13313     |
| BeamRider      | 384         | 5852   | 11325      | 3933   | 1550       | 12402                   | 7744      |
| Boxing         | -37         | 78     | 99         | -5     | -3         | -47                     | 94        |
| Breakout       | 7           | 96     | 275        | 207    | 150        | 252                     | 8         |
| Carnival       | 362         | 4785   | 4702       | 977    | 1144       | 665                     | 1054      |
| Centipede      | 3534        | 2583   | 1559       | 1067   | 2535       | 2422                    | 3186      |
| ChopperCommand | 474         | 2691   | 2631       | 882    | 649        | 960                     | 3238      |
| CrazyClimber   | 4           | 104569 | 117285     | 136788 | 3861       | 1                       | 25509     |
| DemonAttack    | 119         | 6362   | 121236     | 2466   | 2168       | 40692                   | 61531     |
| DoubleDunk     | -18         | -7     | -15        | -20    | -14        | -15                     | -20       |
| Enduro         | 0           | 629    | 1391       | 0      | 16         | 2                       | 405       |
| FishingDerby   | -98         | 1      | 37         | -99    | -95        | -96                     | -77       |
| Freeway        | 7           | 26     | 34         | 28     | 18         | 31                      | 24        |
| Frostbite      | 28          | 367    | 2826       | 102    | 204        | 29                      | 643       |
| Gopher         | 208         | 5480   | 3554       | 3299   | 467        | 105                     | 4384      |
| Gravitar       | 43          | 330    | 1217       | 26     | 2          | 64                      | 97        |
| Hero           | 23          | 17325  | 10148      | 896    | 2904       | 2                       | 1952      |
| IceHockey      | -13         | -6     | 21         | -14    | -14        | -5                      | -7        |
| Jamesbond      | 24          | 573    | 1085       | 198    | 9          | 263                     | 398       |
| Kangaroo       | 199         | 11486  | 10826      | 1671   | 394        | 819                     | 2007      |
| Krull          | 1188        | 6098   | 9193       | 79     | 827        | 2561                    | 4551      |
| KungFuMaster   | 2807        | 23435  | 32442      | 14496  | 2269       | 30                      | 16761     |
| MsPacman       | 836         | 3402   | 5460       | 1255   | 1018       | 475                     | 1523      |
| NameThisGame   | 848         | 7279   | 16307      | 2977   | 2052       | 8568                    | 6178      |
| Phoenix        | 415         | 4997   | 18791      | 12817  | 5007       | 5896                    | 8969      |
| Pong           | -21         | 17     | 21         | 15     | -9         | 19                      | 19        |
| Pooyan         | 748         | 3212   | 1826       | 1844   | 1244       | 1383                    | 1688      |
| Qbert          | 172         | 10118  | 13679      | 3202   | 1807       | 9748                    | 5226      |
| Riverraid      | 1221        | 11639  | 11623      | 316    | 2430       | 319                     | 8348      |
| RoadRunner     | 2543        | 36925  | 49522      | 332    | 4609       | 531                     | 13327     |
| Robotank       | 2           | 60     | 76         | 18     | 10         | 5                       | 4         |
| Seaquest       | 44          | 1601   | 260        | 75     | 122        | -                       | 951       |
| SpaceInvaders  | 131         | 1794   | 23138      | 1148   | 1345       | -                       | 908       |
| StarGunner     | 643         | 42165  | 844        | 719    | 899        | 801                     | 9670      |
| TimePilot      | 2244        | 3654   | 13231      | 3956   | 4006       | 1375                    | 1447      |
| UpNDown        | 1174        | 8488   | 25181      | 12142  | 7089       | 11564                   | 9136      |
| VideoPinball   | 3877        | 63406  | 280340     | 3314   | 21555      | 6372                    | 12319     |
| WizardOfWor    | 465         | 2066   | 5079       | 1289   | 435        | 275                     | 1399      |
| YarsRevenge    | 3089        | 23909  | 49298      | 2360   | 6591       | 2068                    | 23687     |
